# Supplementary material for: The Brain Vulnerability Index: Development and Validation of a Machine Learning–Derived, Community-Informed Geospatial Risk Score for Cognitive Impairment
Source: Research Square preprint supplement (doi:10.21203/rs.3.rs-9381770/v1), 2026-04-27
Supplement: Supplementary file 1 [file 66e7e2388523f16b42620e88.pdf]

## Supplementary Materials

| Item                                                                | Page |
|---------------------------------------------------------------------|------|
| Table S1. ADRD Definition (ICD-10/SNOMED Codes)                     | 2    |
| Table S2. Detailed SDOH Domain Differences by Cognitive Status      | 3    |
| Table S3. LASSO-Selected Feature Coefficients                       | 4    |
| Figure S1. BVI Across Dallas Metropolitan Area Census Block Groups. | 6    |
| Figure S2. BVI vs. MoCA by Cohort (Scatter Plots)                   | 7    |
| Figure S3. MoCA Scores by BVI Risk Group (Box Plots)                | 8    |
| Figure S4. BVI Correlations with SVI/ADI (Scatter Plots)            | 9    |

**Table S1. ADRD Case Definition Using ICD-10 and SNOMED CT Codes**

Source: Authors' own analyses.

| Code Group | Description                                                                                                                                                                                       |
|------------|---------------------------------------------------------------------------------------------------------------------------------------------------------------------------------------------------|
| A81        | Creutzfeldt-Jakob disease (all variants)                                                                                                                                                          |
| F00        | Dementia in Alzheimer's disease                                                                                                                                                                   |
| F01        | Vascular dementia                                                                                                                                                                                 |
| F02        | Dementia in other diseases classified elsewhere                                                                                                                                                   |
| F03        | Unspecified dementia                                                                                                                                                                              |
| F04        | Amnesic disorder due to known physiological condition                                                                                                                                             |
| F06        | Other mental disorders due to known physiological condition                                                                                                                                       |
| F07        | Personality and behavioral disorders due to known physiological condition                                                                                                                         |
| F10.27     | Alcohol dependence with alcohol-induced persisting dementia                                                                                                                                       |
| G10        | Huntington's disease                                                                                                                                                                              |
| G20        | Parkinson's disease                                                                                                                                                                               |
| G30        | Alzheimer's disease (all types)                                                                                                                                                                   |
| G31.0      | Frontotemporal dementia                                                                                                                                                                           |
| G31.01     | Pick's disease                                                                                                                                                                                    |
| G31.09     | Other frontotemporal dementia                                                                                                                                                                     |
| G31.1      | Senile degeneration of brain, not elsewhere classified                                                                                                                                            |
| G31.2      | Degeneration of nervous system due to alcohol                                                                                                                                                     |
| G31.81     | Alpers disease                                                                                                                                                                                    |
| G31.83     | Dementia with Lewy bodies                                                                                                                                                                         |
| G31.84     | Mild cognitive impairment, so stated                                                                                                                                                              |
| G31.89     | Other specified degenerative diseases of nervous system                                                                                                                                           |
| G31.9      | Degenerative disease of nervous system, unspecified                                                                                                                                               |
| SNOMED CT  | Amnesia (52448006), memory impairment (271594007, 75528006, 271618001), Alzheimer's disease (195967001), vascular dementia (230265002), dementia with Lewy bodies (77176002), cognitive disorders |
| R41        | Amnesia and cognitive symptoms (R41.0–R41.9)                                                                                                                                                      |

**Table S2. Coefficients for Block Group Level Model (Sorted by Absolute Value of Feature Coefficients)**

Source: Authors' own analyses.

| Feature Name                          | Coefficients |
|---------------------------------------|--------------|
| Chronic Disease Burden                | 0.627        |
| Education And Literacy                | 0.346        |
| Community Vulnerability               | -0.278       |
| Life Expectancy                       | 0.244        |
| Obesity                               | -0.224       |
| Good Health                           | -0.201       |
| Education Level                       | -0.199       |
| Alcohol Abuse                         | 0.160        |
| High Blood Pressure                   | -0.138       |
| Household Essentials                  | 0.135        |
| Disease Burden                        | 0.126        |
| Equitable Communities                 | 0.114        |
| Chronic Obstructive Pulmonary Disease | -0.097       |
| Literacy                              | -0.086       |
| Connectivity                          | 0.078        |
| Households Without Vehicles           | 0.075        |
| Mental Health                         | -0.040       |

**Table S3. SDOH Feature Values Stratified by Cognitive Impairment Status**

Source: Authors' own analyses.

| SDOH Feature                                   | Overall        | No Cognitive Impairment | Cognitive Impairment | p-value |
|------------------------------------------------|----------------|-------------------------|----------------------|---------|
| <b>Community Vulnerability Index Value</b>     | 0.55<br>(0.27) | 0.54 (0.27)             | 0.59 (0.26)          | <0.001  |
| <b>Household Essentials Index Value</b>        | 0.54<br>(0.27) | 0.53 (0.27)             | 0.58 (0.26)          | <0.001  |
| <i>Food Insecurity Index Value</i>             | 0.53<br>(0.27) | 0.53 (0.27)             | 0.57 (0.26)          | <0.001  |
| <i>Paycheck Predictability Index Value</i>     | 0.47<br>(0.27) | 0.47 (0.27)             | 0.49 (0.28)          | <0.001  |
| <i>Household Structure Index Value</i>         | 0.56<br>(0.27) | 0.56 (0.27)             | 0.58 (0.27)          | <0.001  |
| <i>Health Insurance Coverage Index Value</i>   | 0.61<br>(0.28) | 0.6 (0.29)              | 0.63 (0.27)          | <0.001  |
| <i>Median Household Income Index Value</i>     | 0.53<br>(0.27) | 0.52 (0.28)             | 0.57 (0.26)          | <0.001  |
| <b>Empowered People Index Value</b>            | 0.51<br>(0.26) | 0.5 (0.26)              | 0.55 (0.24)          | <0.001  |
| <i>Education Level Index Value</i>             | 0.6 (0.29)     | 0.6 (0.29)              | 0.64 (0.28)          | <0.001  |
| <i>Literacy Index Value</i>                    | 0.7 (0.24)     | 0.69 (0.25)             | 0.73 (0.2)           | <0.001  |
| <i>Education And Literacy Index Value</i>      | 0.69<br>(0.26) | 0.68 (0.27)             | 0.73 (0.23)          | <0.001  |
| <i>Connectivity Index Value</i>                | 0.53<br>(0.29) | 0.52 (0.29)             | 0.57 (0.28)          | <0.001  |
| <i>Walk Score Index Value</i>                  | 0.33<br>(0.25) | 0.33 (0.25)             | 0.31 (0.25)          | <0.001  |
| <i>Households Without Vehicles Index Value</i> | 0.56<br>(0.29) | 0.56 (0.29)             | 0.6 (0.29)           | <0.001  |
| <b>Equitable Communities Index Value</b>       | 0.61<br>(0.24) | 0.61 (0.24)             | 0.64 (0.23)          | <0.001  |
| <i>Unemployment Index Value</i>                | 0.53<br>(0.26) | 0.53 (0.26)             | 0.54 (0.26)          | <0.001  |
| <i>Affordable Housing Index Value</i>          | 0.58<br>(0.25) | 0.57 (0.26)             | 0.62 (0.24)          | <0.001  |
| <i>Neighborhood Safety Index Value</i>         | 0.61<br>(0.26) | 0.61 (0.26)             | 0.65 (0.25)          | <0.001  |
| <i>Neighborhood Stability Index Value</i>      | 0.44<br>(0.24) | 0.44 (0.24)             | 0.45 (0.24)          | <0.001  |
| <i>Clean Air Index Value</i>                   | 0.68<br>(0.18) | 0.68 (0.18)             | 0.68 (0.18)          | 0.33    |

|                                                          |                |             |             |        |
|----------------------------------------------------------|----------------|-------------|-------------|--------|
| <i>Green Space Access Index Value</i>                    | 0.54<br>(0.23) | 0.54 (0.23) | 0.54 (0.23) | <0.001 |
| <b>Good Health Index Value</b>                           | 0.48<br>(0.25) | 0.47 (0.25) | 0.52 (0.25) | <0.001 |
| <i>Life Expectancy Index Value</i>                       | 0.57<br>(0.28) | 0.57 (0.28) | 0.61 (0.28) | <0.001 |
| <i>Alcohol Abuse Index Value</i>                         | 0.47<br>(0.27) | 0.48 (0.27) | 0.45 (0.28) | <0.001 |
| <i>Mental Health Index Value</i>                         | 0.56 (0.3)     | 0.55 (0.3)  | 0.59 (0.29) | <0.001 |
| <i>Cancer Index Value</i>                                | 0.34<br>(0.26) | 0.34 (0.26) | 0.32 (0.24) | <0.001 |
| <i>Disease Burden Index Value</i>                        | 0.39<br>(0.22) | 0.39 (0.22) | 0.41 (0.22) | <0.001 |
| <i>Chronic Disease Burden Index Value</i>                | 0.48<br>(0.28) | 0.47 (0.28) | 0.51 (0.28) | <0.001 |
| <i>Chronic Obstructive Pulmonary Disease Index Value</i> | 0.48<br>(0.26) | 0.48 (0.26) | 0.52 (0.26) | <0.001 |
| <i>Coronary Heart Disease Index Value</i>                | 0.43<br>(0.24) | 0.42 (0.23) | 0.46 (0.24) | <0.001 |
| <i>Diabetes Index Value</i>                              | 0.51<br>(0.28) | 0.5 (0.28)  | 0.55 (0.28) | <0.001 |
| <i>Asthma Index Value</i>                                | 0.47 (0.3)     | 0.47 (0.3)  | 0.5 (0.31)  | <0.001 |
| <i>High Blood Pressure Index Value</i>                   | 0.5 (0.28)     | 0.49 (0.28) | 0.52 (0.29) | <0.001 |
| <i>Obesity Index Value</i>                               | 0.49<br>(0.28) | 0.48 (0.28) | 0.52 (0.28) | <0.001 |
|                                                          |                |             |             |        |

Values shown as mean (standard deviation).

**Figure S1. Brain Vulnerability Index (BVI) Across Dallas Metropolitan Area Census Block Groups.**

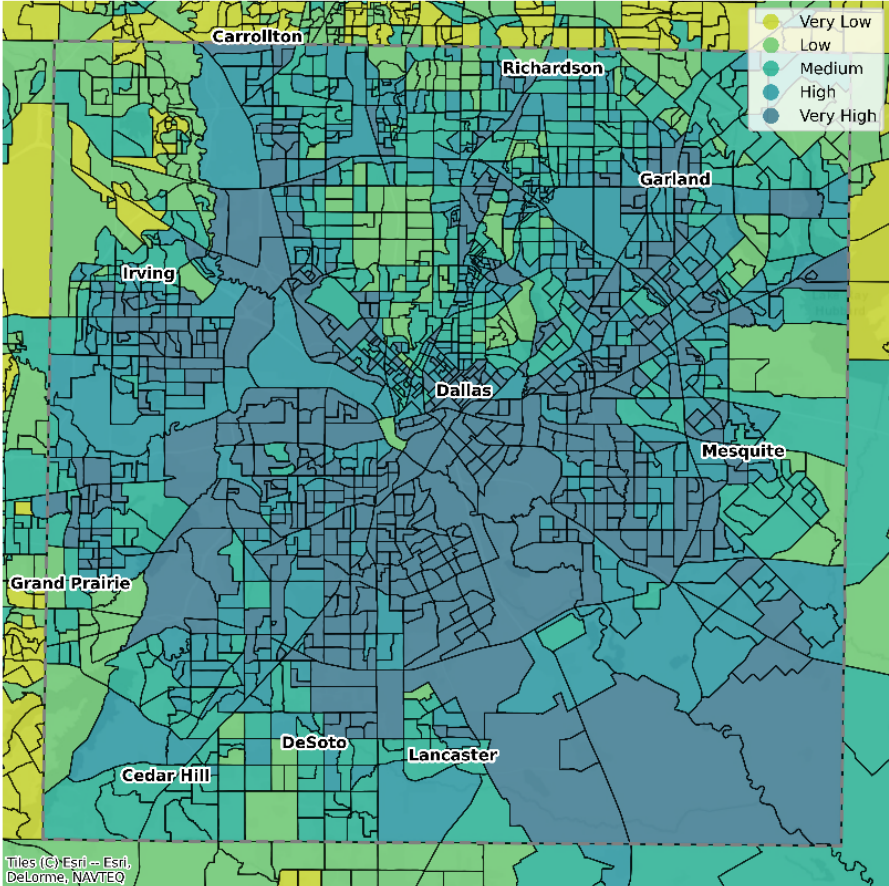

The map presents complementary views of Brain Vulnerability Index, BVI, across the Dallas metropolitan area. The Block group Risk Score map (Figure 1) offers a high-resolution perspective, revealing granular variations in risk within neighborhoods. Central Dallas and adjacent areas show clusters of "High" to "Very High" risk, while outlying regions such as Carrollton and Richardson exhibit predominantly "Low" to "Medium" risk. High-risk zones are concentrated in Dallas, DeSoto, and Lancaster, while suburban areas maintain lower risk profiles. The block group-level map is effective for identifying micro-level disparities and guiding targeted interventions, such as community outreach or localized health services.

Source: Authors' own analyses.

**Figure S2: Association Between Brain Vulnerability Index and Cognitive Function by Study**

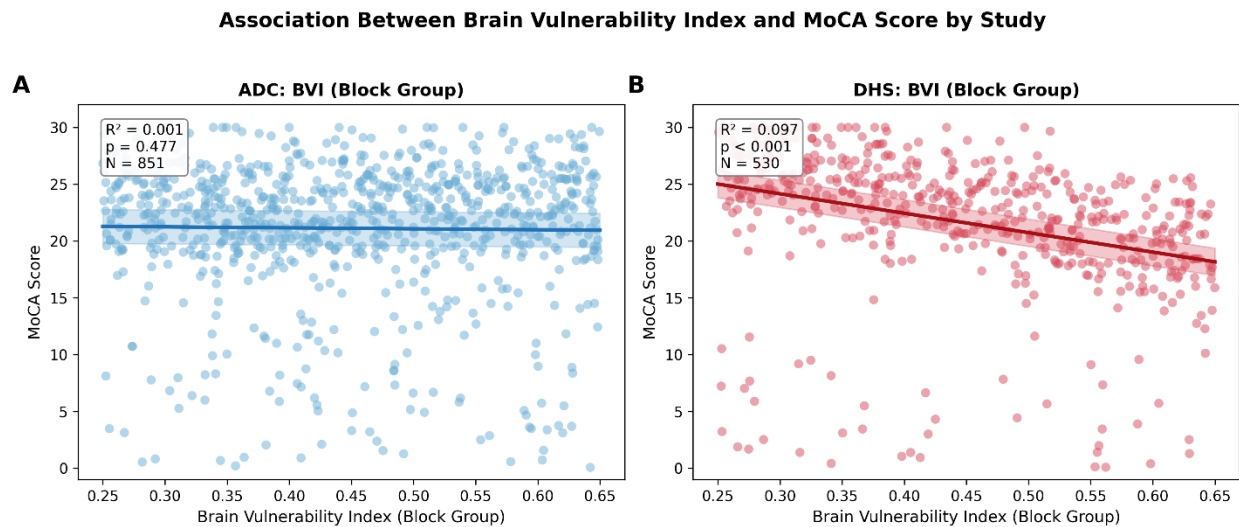

**Footnote.** Scatter plots show the relationship between the Brain Vulnerability Index (BVI) and Montreal Cognitive Assessment (MoCA) scores. MoCA: range 0-30 points (higher=better cognitive function); Regression lines with 95% confidence bands are shown.  $R^2$ , p-values, and sample sizes are displayed for each panel. The association between BVI and MoCA was significant only in the DHS cohort ( $p < 0.001$  for both geographic levels).

Source: Authors' own analyses.

**Figure S3.** MOCA Scores by BVI Risk Group Using top Quartile Cutoff

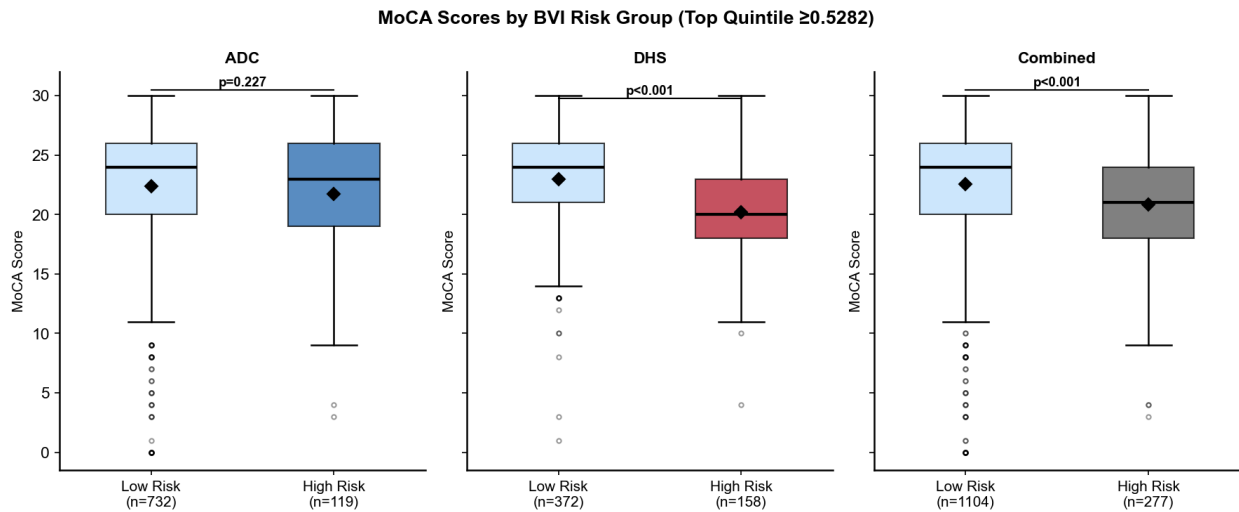

**Footnote:** Box plots showing the distribution of Montreal Cognitive Assessment (MoCA) scores by Brain Vulnerability Index (BVI) risk group across two independent validation cohorts and the combined sample. Boxes represent the interquartile range (25th–75th percentile), horizontal lines indicate the median, diamond markers indicate the mean, whiskers extend to 1.5 times the interquartile range, and circles represent outliers. The BVI top quintile cutoff ( $\geq 0.5282$ ) was used to classify participants as high risk or low risk. In the Dallas Heart Study (DHS) and combined analysis, the high-risk group ( $n = 158$ ) had significantly lower MoCA scores compared to the low-risk group. In the Alzheimer's Disease Center (ADC) cohort, the difference was not statistically significant. MoCA: range 0-30 points (higher=better).

Source: Authors' own analyses.

**Figure S4. Associations Between Brain Vulnerability Index (BVI) and Established**

**Associations Between Brain Vulnerability Index (BVI) and Commonly Used Geolocation Indices**

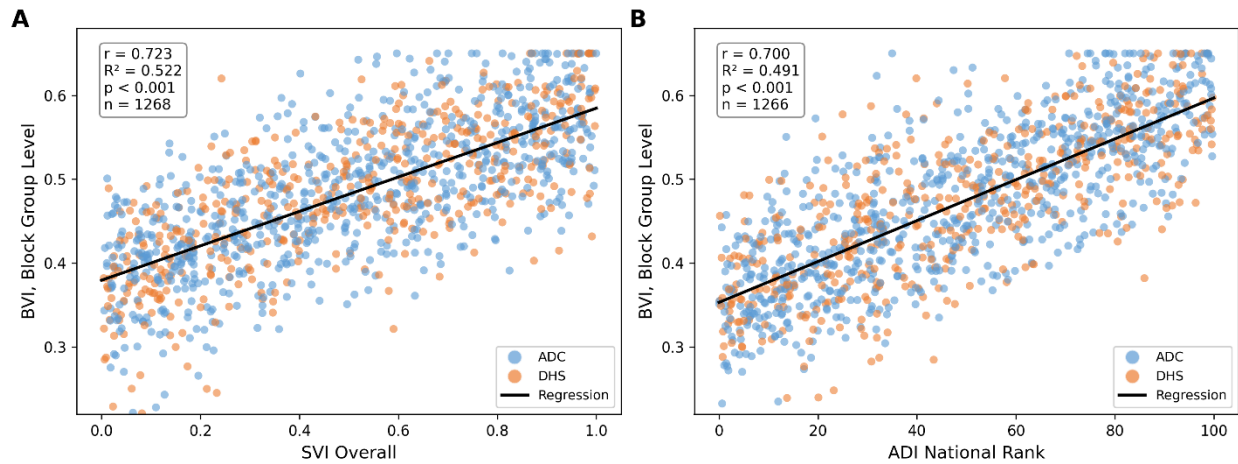

**Footnote:** Scatter plots illustrating the correlation between BVI at the block group level and (A) Social Vulnerability Index (SVI) Overall and (B) Area Deprivation Index (ADI) National Rank. Each point represents an individual participant, with blue circles indicating Alzheimer's Disease Center (ADC) participants and orange circles indicating Dallas Heart Study (DHS) participants. Black lines represent linear regression fits. Abbreviations: BVI, Brain Vulnerability Index; SVI, Social Vulnerability Index; ADI, Area Deprivation Index; ADC, Alzheimer's Disease Center; DHS, Dallas Heart Study.

Source: Authors' own analyses.
